# Supplementary material for: Cannabidiol effects on behaviour and immune gene expression in zebrafish (Danio rerio)
Source: PLoS One. 2018 Jul 31;13(7):e0200016. doi: 10.1371/journal.pone.0200016 (PMC6067702; doi:10.1371/journal.pone.0200016)
Supplement: S2 Table — Raw data from the behavioural experiment and comparison of treatment groups p<0.05, Student’s t-test. (XLSX) [file pone.0200016.s002.xlsx]

## Sheet: Ark1
Behaviour Data
Water control					Ethanol control					CBD
Arena 1	Distance moved	Velocity	Total rotations		Arena 1	Distance moved	Velocity	Total rotations		Arena 1	Distance moved	Velocity	Total rotations
	Center-point	Center-point				Center-point	Center-point				Center-point	Center-point
	Total	Mean	Frequency			Total	Mean	Frequency			Total	Mean	Frequency
	mm	mm/s				mm	mm/s				mm	mm/s
Trial 1	20733.7	115.188	331		Trial 1	22252.5	123.604	323		Trial 1	2404.34	13.3551	138
Trial 2	16873	93.7222	253		Trial 2	20725.1	115.119	400		Trial 2	14358.9	79.7576	671
Trial 3	20711.2	115.042	331		Trial 3	21235.5	117.998	386		Trial 3	3364.23	18.6869	204
Trial 4	23051.5	128.041	308		Trial 4	19045.5	105.79	216		Trial 4	20967.3	116.465	334
Trial 5	24984.5	138.779	440		Trial 5	11289.6	62.709	157		Trial 5	17875.2	99.4919	447
Trial 6	20676.2	114.848	318		Trial 6	18121	100.654	349		Trial 6	1195.8	6.64218	144
Trial 7	18166.7	100.909	231		Trial 7	23464	130.333	313		Trial 7	18461.7	102.547	420
Trial 8	26858.4	149.215	407		Trial 8	29947.3	166.437	289		Trial 8	19895.6	110.512	296
Trial 9	26122.7	145.1	330		Trial 9	14498	80.605	358		Trial 9	16439.3	91.3132	195
Trial 10	24369.4	135.362	334		Trial 10	17991.6	99.9359	263		Trial 10	25139.8	139.641	490
Sum	222547	1236.21	3283		Sum	198570	1103.18	3054		Sum	140102	778.412	3339
Mean	22254.7	123.621	328.3		Mean	19857	110.318	305.4		Mean	14010.2	77.8412	333.9
SEM	1007.85	5.59911	18.5408		SEM	1524.76	8.47328	22.9265		SEM	2568.9	14.2722	51.9857
Arena 2	Distance moved	Velocity	Total rotations		Arena 2	Distance moved	Velocity	Total rotations		Arena 2	Distance moved	Velocity	Total rotations
	Center-point	Center-point				Center-point	Center-point				Center-point	Center-point
	Total	Mean	Frequency			Total	Mean	Frequency			Total	Mean	Frequency
	mm	mm/s				mm	mm/s				mm	mm/s
Trial 1	16643.6	92.448	274		Trial 1	16836	93.5167	138		Trial 1	1836.7	10.2021	109
Trial 2	14500.8	80.5459	193		Trial 2	16468.6	91.4761	671		Trial 2	8334.97	46.2973	440
Trial 3	18227	101.243	384		Trial 3	16249.1	90.2572	204		Trial 3	2226.75	12.8295	127
Trial 4	17143.7	95.2262	297		Trial 4	16136.7	89.6327	334		Trial 4	13663.3	75.894	260
Trial 5	14877.1	82.6362	368		Trial 5	8282.35	46.005	447		Trial 5	12081.3	67.1064	416
Trial 6	14880.2	82.6534	220		Trial 6	14116.3	78.9067	344		Trial 6	1093.15	6.07202	106
Trial 7	14213	78.9474	210		Trial 7	16337	90.7452	292		Trial 7	13273.9	73.7312	279
Trial 8	16468.2	91.5755	337		Trial 8	24019.3	133.417	203		Trial 8	14440.8	80.2127	260
Trial 9	20141	111.875	259		Trial 9	11638	65.5916	282		Trial 9	11954.2	66.4009	189
Trial 10	21433.2	119.052	502		Trial 10	13820.5	77.7313	158		Trial 10	16410.6	91.1541	459
Sum	168528	936.203	3044		Sum	153904	857.279	3073		Sum	95315.7	529.9	2645
Mean	16852.8	93.6203	304.4		Mean	15390.4	85.7279	307.3		Mean	9531.57	52.99	264.5
SEM	736.56	4.09072	28.6312		SEM	1218.99	6.72514	47.6687		SEM	1732.28	9.60273	40.7115
Arena 1	Ethanol vs Water		CBD vs Water		Ethanol vs CBD					Ratio of A vs B = A/B
	Ratio	t-test	Ratio	t-test	Ratio	t-test				Student's t-test
Velocity	1.12058	0.114989	0.629678	0.00551626	0.705604	0.0399292				Tail	1
Total rotations	0.930247	0.235369	1.01706	0.462191	1.09332	0.319945				Threshold	0.05
Arena 2	Water vs Ethanol		Water vs CBD		Ethanol vs CBD
	Ratio	t-test	Ratio	t-test	Ratio	t-test
Velocity	0.915699	0.177055	0.56601	0.000832445	0.618118	0.0081581
Total rotations	1.00953	0.480542	0.868922	0.228393	0.860722	0.262673
Arena 2 vs Arena 1 (vertical vs horisontal)	Water		Ethanol		CBD
	Ratio	t-test	Ratio	t-test	Ratio	t-test
Velocity	1.32045	0.000332855	1.28684	0.0224081	1.46898	0.093686
Total rotations	1.07852	0.25733	0.993817	0.486596	1.26238	0.165965
