# Supplementary material for: Cannabidiol effects on behaviour and immune gene expression in zebrafish (Danio rerio)
Source: PLoS One. 2018 Jul 31;13(7):e0200016. doi: 10.1371/journal.pone.0200016 (PMC6067702; doi:10.1371/journal.pone.0200016)
Supplement: S3 Table — (XLSX) [file pone.0200016.s003.xlsx]

## Sheet: Genes of Interest
	Cycle of quantification, Cq
Samples No-Group	Mean of ref.genes	cd4-2	cd8a	gata3	ighm	ighz2	il1b	il4	il13	il6	il8	il10	il12	il22	il17a/f1	il17a/f2	il17a/f3	ifng1	mmp9	S100A1	s100a10b	tbx21	tgfba	tnfa
01-H2O	17.0567	30	31.24	30.62	28.64	33.81	31.29	35.01	No Cq	36.47	34.91	37.02	No Cq	33.5	33.97	No Cq	34.99	33.81	31.73	24.44	32.79	32.44	27.47	33.74
02-H2O	17.6133	31.08	30.68	30.94	29.4	35.55	31.84	34.92	31.77	No Cq	30.35	35.45	34.28	No Cq	35.11	No Cq	35.08	35.12	31.92	25.47	32.97	33.42	27.55	32.89
03-H2O	17.9067	30.26	30.28	30	27.72	32.63	29.43	34.84	31.14	35.44	35.3	36.24	No Cq	36.15	34.69	No Cq	32.96	32.13	30.89	24.54	33.64	31.14	27.33	31.72
04-H2O	18.365	29.76	30.29	28.17	27.38	32.74	27.36	34.75	30.56	38.25	30.41	34.43	No Cq	No Cq	33.82	39.55	32.58	32.91	No Cq	24.28	30.02	31.23	27.53	31.04
05-H2O	16.4867	28.62	31.07	29.42	30.09	32.69	No Cq	35.69	30.27	33.32	30.9	32.32	32.92	32.77	33.59	24.62	33.31	33.09	No Cq	24.79	29.42	30.44	26.91	31.69
06-H2O	18.04	31.17	32.4	30.18	30.49	33.73	30.93	36.11	31.19	No Cq	30.96	36.5	34.32	33.79	36.19	No Cq	No Cq	No Cq	29.73	24.29	31.43	30.58	27.06	34.97
07-H2O	18.16	29.96	30.09	28.99	28.8	No Cq	30.3	33.05	30.87	No Cq	31.01	35.45	34.94	33.74	35.93	No Cq	32.15	32.35	30.52	25.3	30.67	31.6	27.26	32.68
08-H2O	18.3267	31.02	31.25	32.45	29.23	35.28	30.18	No Cq	31.52	No Cq	32.4	38.87	No Cq	No Cq	36.03	31.93	33.39	34.38	31.28	25.9	30.13	34.42	28.3	33.66
09-H2O	17.81	29.96	29.48	29.74	28.56	31.99	29.73	32.88	29.84	No Cq	31.41	36.23	No Cq	35.08	35.05	No Cq	33.98	33.27	31.43	25.56	32.36	32.84	28.16	32.09
10-H2O	17.42	28.7	27.53	29.24	26.82	33.31	27.43	33.5	29.72	37.15	31.12	34.98	No Cq	33.56	No Cq	No Cq	31.5	34.64	29.92	23.68	28.97	29.29	26.45	31.9
11-EtOH	16.89	28.82	No Cq	30.05	No Cq	33.39	No Cq	No Cq	No Cq	34.39	31.66	32.92	33.48	32.13	32.53	No Cq	34.38	33.48	No Cq	24.68	30.36	29.99	27.29	32.49
12-EtOH	18.05	29.47	30.51	28.02	26.95	31.84	27.63	34.53	30.8	No Cq	30.34	35.02	35.38	34.32	32.87	32.62	33.12	31.82	29.01	23.93	30.8	29.94	25.97	32.24
13-EtOH	17.3633	No Cq	29.89	28.99	27.35	32.05	28.99	34.24	29.83	34.72	30.8	36.05	No Cq	33.17	No Cq	33.07	34.8	33.56	29.73	24.05	31.97	29.11	26.85	33.76
14-EtOH	17.2967	28.85	27.79	27.89	26.92	32.19	27.87	32.07	30.35	36.74	29.94	33.66	32.39	34.53	34.79	34.21	32.36	32.45	28.28	24.67	33	30.18	26.68	32.14
15-EtOH	17.6467	No Cq	29.72	29.91	28.12	32.06	29.33	34.01	31.23	No Cq	32.76	37.65	34.32	34.11	35.58	No Cq	33.46	35.06	29.08	23.01	27.88	30.17	25.86	34.52
16-EtOH	18.0067	29.58	28.16	29	27.1	33.04	27.85	33.67	28.08	36.83	30.76	34	No Cq	36.59	32.96	No Cq	32.53	34.11	28.36	24.99	30.64	30.95	26.52	32.83
17-EtOH	17.7967	28.93	29.57	29.27	27.95	33.96	28.99	33.91	29.79	36.16	31.72	36.95	32.98	33.21	No Cq	No Cq	32.86	32.61	29.96	24.98	31.86	30.47	26.98	31.89
18-EtOH	19.1533	No Cq	29.74	29.14	No Cq	31.43	29.49	34.2	30.43	34.4	31.42	33.28	No Cq	34.58	No Cq	33.59	31.94	32.86	29.47	24.7	30.88	30.97	26.83	32.67
19-EtOH	17.8567	29.23	29.67	28.07	27.04	32.75	27.44	33.6	29.79	No Cq	30.81	34.27	No Cq	32.45	32.94	No Cq	30.1	31.81	28.82	23.17	26.98	29.31	26.13	31.62
20-EtOH	17.4933	29.11	29.03	28.74	26.94	31.56	28.34	35.14	29.99	34.48	30.59	34.99	34.2	32.91	34.5	34.12	32.1	33.24	28.29	23.48	24.76	29.19	26.29	32.46
21-CBD	17.7	30.64	29.76	28.96	28.47	33.02	28.64	33.78	29.67	No Cq	29.28	37.02	No Cq	35.68	35.2	No Cq	35.11	34.9	29.44	24.96	33.91	30.57	27.62	32.68
22-CBD	17.9	30.55	29.63	30.79	28.68	33.98	29.47	34.22	30.69	No Cq	32.03	36.39	No Cq	35	32.93	No Cq	34.59	34.97	30.38	24.54	33.36	30.95	27.99	32.68
23-CBD	16.8367	30.51	29.45	30.9	28.82	35.49	24.82	32.76	29.14	No Cq	30.11	35.15	No Cq	35.79	No Cq	25.64	34.58	33.32	27.13	25.73	26.47	31.55	28.33	31.78
24-CBD	18.1333	30.3	28.44	29.12	28.9	34.68	29.14	33.13	29.99	No Cq	31.59	33.79	33.86	No Cq	34.05	No Cq	34.08	35.3	31.49	26.37	30.04	31.2	26.82	32.46
25-CBD	19.7667	No Cq	29.77	28.23	No Cq	31.73	27.16	No Cq	29.27	35.72	31.22	36.99	No Cq	34.97	32.95	31.62	32.53	33.23	28.59	25.58	30.61	29.38	27.93	No Cq
26-CBD	18.0633	30.12	29.31	29.43	28.21	32.07	27.91	32.97	30.64	39.1	32.81	35.79	34.07	33.94	36.93	30.43	32.44	No Cq	30.46	24.82	32.49	30.6	27.63	32.56
27-CBD	18.6167	31.05	29.24	26.79	28.36	No Cq	27.68	35.76	31.02	35.71	32.88	35.39	No Cq	33.27	32.16	No Cq	31.88	32.89	29.93	24.86	28.34	28.87	27.96	32.33
28-CBD	17.9	31.29	30.83	30	27.81	33.25	27.67	35.05	30.76	34.67	32.14	37.84	No Cq	37.16	34.1	27.54	33.81	35	28.2	25.51	32.84	31.36	27.68	33.84
29-CBD	17.885	30.63	28.79	31.15	28.89	33.37	26.67	35.26	30.73	39.17	32.64	35.12	No Cq	33.66	32.94	29.16	33.22	33.45	27.92	24.5	25.42	30.29	27.04	31.95
30-CBD	17.3667	30.37	30.91	30.91	29.52	33.33	No Cq	No Cq	No Cq	36.88	32.29	35.54	No Cq	No Cq	33.97	26.05	33.72	33.99	26.55	25.79	32.62	31.63	28.37	33.9

## Sheet: Reference genes
Gennemsnit	17.4673	17.7078	19.0648	18.1072
SD	1.90454	1.55406	1.20138	1.33223
	b-actin	ELF 1a	RPL-13a	mean
Well Name	Cq (∆R)	Cq (∆R)	Cq (∆R)	Cq (∆R)
1-H2O	15.62	17.05	18.5	17.0567
2-H2O	16.65	18.73	17.46	17.6133
3-H2O	17.18	16.83	19.71	17.9067
4-H2O		17.36	19.37	18.365
5-H2O	15.28	15.56	18.62	16.4867
6-H2O	16.94	17.62	19.56	18.04
7-H2O	17.26	17.73	19.49	18.16
8-H2O	18.02	17.72	19.24	18.3267
9-H2O	17.45	17.45	18.53	17.81
10-H2O	16.43	16.89	18.94	17.42
11-EtOH		15.9	17.88	16.89
12-EtOH	17.18	17.76	19.21	18.05
13-EtOH	16.53	16.8	18.76	17.3633
14-EtOH	16.93	16.82	18.14	17.2967
15-EtOH	16.05	17.99	18.9	17.6467
16-EtOH	16.54	18.58	18.9	18.0067
17-EtOH	16.47	17.31	19.61	17.7967
18-EtOH	20.95	17.66	18.85	19.1533
19-EtOH	17.31	17.27	18.99	17.8567
20-EtOH	16.42	16.78	19.28	17.4933
21-CBD	17.02	17.19	18.89	17.7
22-CBD	16.38	18.1	19.22	17.9
23-CBD	16.43	17.68	16.4	16.8367
24-CBD	17.34	18.27	18.79	18.1333
25-CBD	21.47	18.51	19.32	19.7667
26-CBD	17.65	17.7	18.84	18.0633
27-CBD	17.7	18.42	19.73	18.6167
28-CBD	17.69	16.64	19.37	17.9
29-CBD	16.79	No Cq	18.98	17.885
30-CBD	16.17	17.47	18.46	17.3667
31-LPS+CBD	18.3	18.73	18.86	18.63
32-LPS+CBD	22.18	17.15	18.63	19.32
33-LPS+CBD	16.59	17.63	19.61	17.9433
34-LPS+CBD	17	16.23	18.46	17.23
35-LPS+CBD		17.25	19.36	18.305
36-LPS+CBD	23.77	26.03	25.16	24.9867
37-LPS+CBD	17.59	18.88	17.82	18.0967
38-LPS+CBD		18.03	20.2	19.115
39-LPS+CBD	23.09	18.2	20.1	20.4633
40-LPS+CBD	16.92	17.99	19.48	18.13
41-LPS	17.15	17.09	19.07	17.77
42-LPS	16.54	16.45	18.46	17.15
43-LPS	15.89	17.82	19.25	17.6533
44-LPS	15.1	16.58	16.86	16.18
45-LPS	16.26	16.75	18.49	17.1667
46-LPS		18	19.15	18.575
47-LPS	17.43	17.46	19.12	18.0033
48-LPS	16.48	16.91	18.83	17.4067
49-LPS	16.22	16.58	18.42	17.0733
50-LPS	19.67	22.13	21.97	21.2567
